# Supplementary material for: Interlayer sliding induced antiferroelectricity–ferroelectricity–antiferroelectricity transition in bilayer δ-SiX (X = S/Se)
Source: Royal Society of Chemistry journal article supplement (doi:10.1039/d4tc01133c), 2024-01-01
Supplement: d4tc01133c1.pdf [file d4tc01133c1.pdf]

## Electronic Supplementary Information

### **Interlayer sliding induced antiferroelectricity- ferroelectricity-antiferroelectricity transition in bilayer $\delta$ - SiX (X = S/Se)**

Zihan Qu <sup>1</sup>, Xiaoteng Wang <sup>1</sup>, Jishun Zhang <sup>1</sup>, Shuo Jiang <sup>1</sup>, Zuyu Xu <sup>1</sup>, Fei Yang <sup>1</sup>,  
Zuheng Wu <sup>1\*</sup>, Yuehua Dai <sup>1\*</sup>, and Yunlai Zhu <sup>1\*</sup>

<sup>a</sup> School of Integrated Circuits, Anhui University, Hefei, Anhui, 230601, China.

#### **Corresponding Authors**

\*E-mail: [wuzuheng@ahu.edu.cn](mailto:wuzuheng@ahu.edu.cn) (Z.-H. Wu), [daiyuehua2013@163.com](mailto:daiyuehua2013@163.com) (Y.-H. Dai),  
[zhuyunlai@ahu.edu.cn](mailto:zhuyunlai@ahu.edu.cn) (Y.-L. Zhu)

### S1. Interpretation of AA-AB, AA-AC, AA-AD slip path in top views.

In order to simplify the process of configuration sliding, we only select a part of the AA configuration (highlighted region 1) as a schematic. To transition to AB stacking, we shift the upper SiS layer of the AA configuration by  $a/2$  along the  $x$ -axis, as illustrated in **Fig. S1(a)**. Similarly, AC stacking could be obtained by shifting the upper SiS layer of AA structure by  $b/2$  along the  $y$ -axis, as depicted in **Fig. S1(b)**. Initially, AD configuration is attained by  $a/2$  along the  $x$ -axis, followed by  $b/2$  along the  $y$ -axis, as demonstrated in **Fig. S1(c)**.

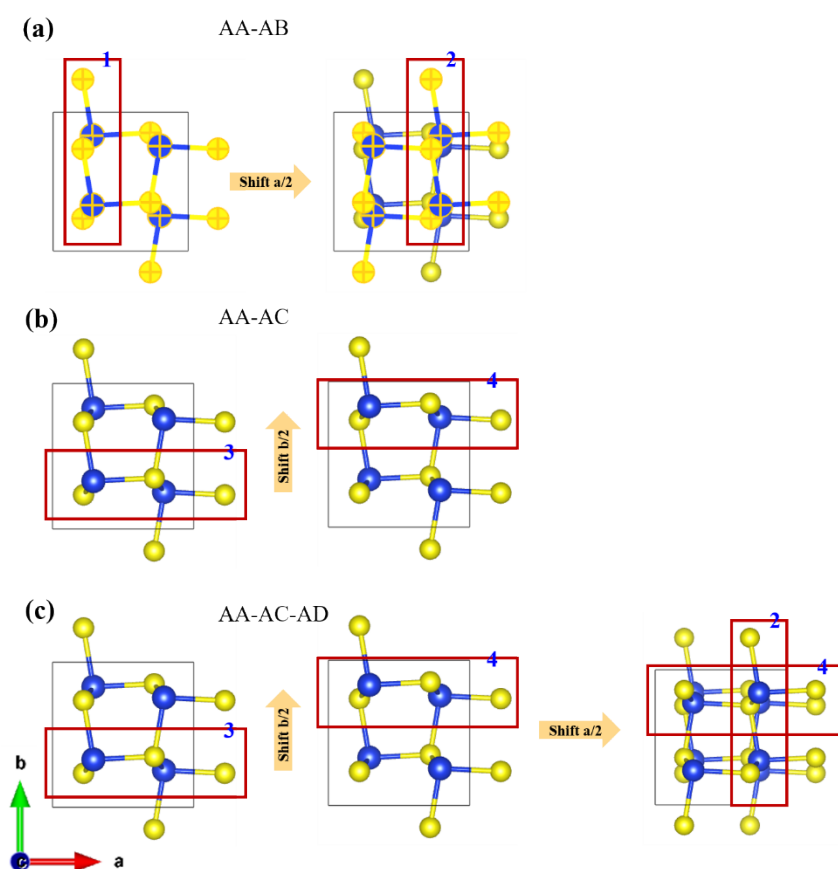

**Fig. S1** (a) Interpretation of AA-AB slip path in top views. (b) Interpretation of AA-AC slip path in top views. (c) Interpretation of AA-AD slip path in top views. The emphasized regions (1, 2, 3, 4) are partial sliding changes during the sliding process.

## S2. Interpretation of AA, AB and anti-AB stacking in side views.

To clearly identify the difference between AA and AB stacking, we highlighted the region 1 and region 2 to analyze their atomic structure changes. As shown in **Fig. S2(a)** and **(b)**, region 1 shifts  $a/2$  along the  $x$ -axis to reach region 2, inducing a distinct variation in the marked region and then obtaining AB stacking. Furthermore, for AB stacking of bilayer  $\delta$ -SiS, when the polarization of each monolayer is oriented in the same direction, it demonstrates a ferroelectric state, referred to as the AB stacking. Conversely, when the polarization directions of each monolayer oppose each other, it exhibits an antiferroelectric state, termed an anti-AB stacking structure, depicted in **Fig. S2(c)**.

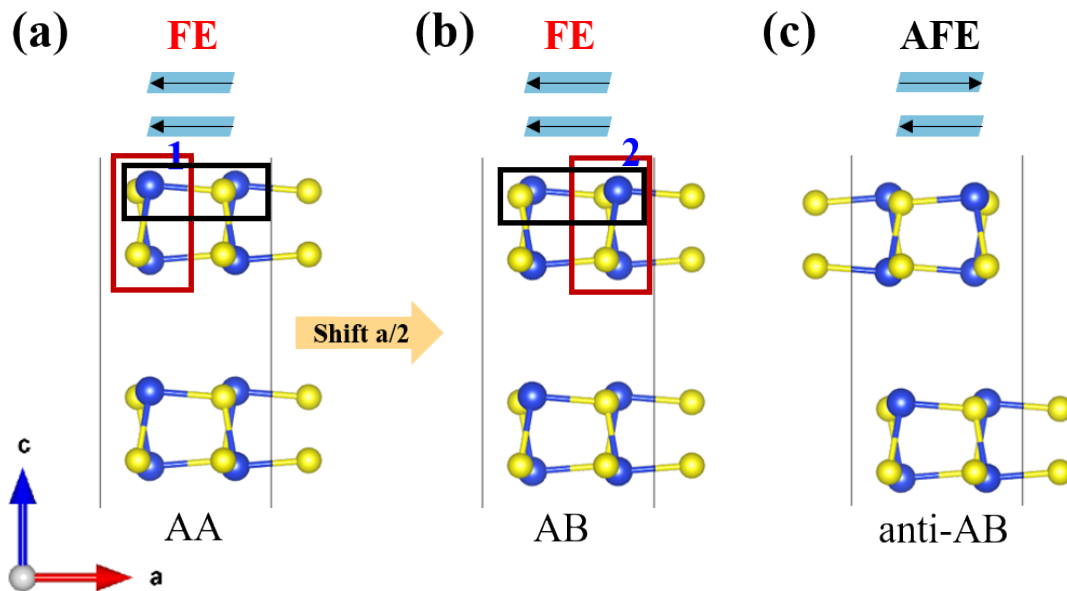

**Fig. S2** Side views of (a) AA, (b) AB and (c) anti-AB stacking. The highlighted regions (1, 2) are partial sliding changes during the sliding process. The black rectangular display the difference in AA and AB stacking in the side views.

**S3. Available ferroelectric (FE) and anti-ferroelectric (AFE) stackings and their energy difference between FE and AFE state.**

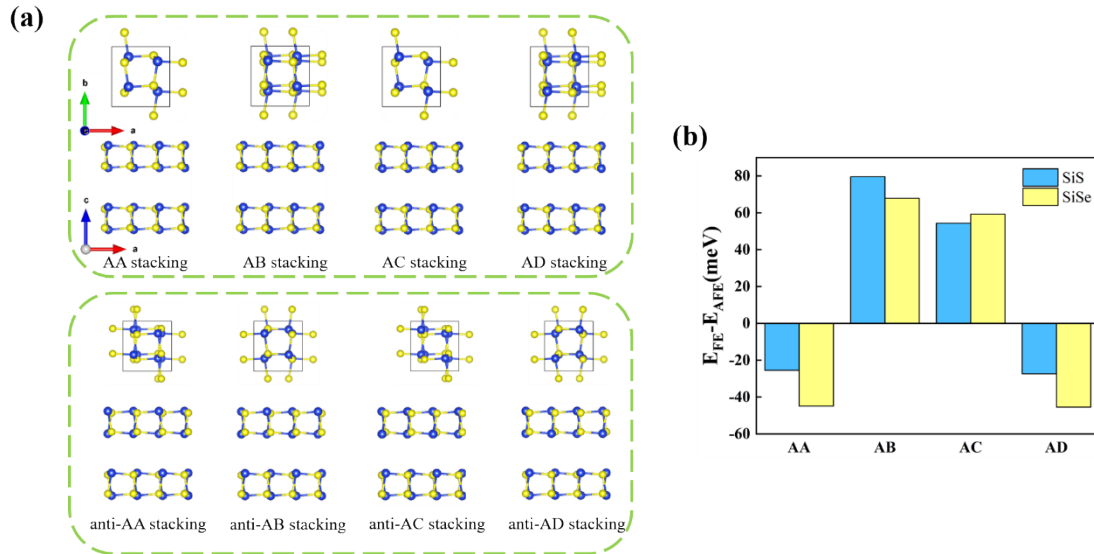

**Fig. S3** (a) Top and side views of atomic structures of bilayer  $\delta$ -SiS ( $X = S / Se$ ) for FE and AFE state. (b) Total energy difference between FE and AFE state for SiS and SiSe bilayers.

**S4. The detailed total energies  $E$  and energy difference  $E_{diff}$  of bilayer  $\delta$ -SiX (X = S / Se) among all possible stackings.**

According to energy computations from Xu *et al.*,  $E_{diff}$  can be defined as the energy difference between total energy with different stackings and the lowest energy in FE or AFE state among all stackings.

$$E_{diff} = E - E_{lowest}$$

where  $E$  is corresponding energy for different stackings and  $E_{lowest}$  is the lowest energy among all stackings in two states (FE and AFE).

By computing the total energies and comparing them systematically in different stackings, we can conclude that bilayer  $\delta$ -SiX (X = S / Se) prefers to be in AFE state under AB and AC stacking, while being in FE state under AA and AD stacking, listed in **Table S1**. Meanwhile, the lowest energy in bilayer SiS or SiSe is set as a reference to reflect the energy difference among different stackings and states intuitively.

**Table S1** The total energies  $E$  and energy differences  $E_{diff}$  for per unit of AA, AB, AC and AD stacking of bilayer  $\delta$ -SiX (X = S/Se) under FE and AFE state. The emphasized data are the lowest energy among eight stackings, considering FE and AFE states.

| Materials | Stackings | FE state |                  | AFE state      |                  |
|-----------|-----------|----------|------------------|----------------|------------------|
|           |           | $E$ (eV) | $E_{diff}$ (meV) | $E$ (eV)       | $E_{diff}$ (meV) |
| SiS       | AA        | -78.814  | 211              | -78.788        | 237              |
|           | AB        | -78.946  | 79               | <b>-79.025</b> | <b>0</b>         |
|           | AC        | -78.785  | 240              | -78.839        | 186              |
|           | AD        | -78.769  | 256              | -78.742        | 283              |
| SiSe      | AA        | -73.113  | 868              | -73.068        | 913              |
|           | AB        | -72.995  | 986              | -73.063        | 918              |
|           | AC        | -72.922  | 1059             | <b>-73.981</b> | <b>0</b>         |
|           | AD        | -73.067  | 914              | -73.022        | 959              |

**S5. Atomic structures of reversible AFE-FE-AFE transition through mechanical interlayer sliding along the path  $AC_{AFE}$ - $AD_{FE}$ - $AC_{AFE}$  of bilayer  $\delta$ -SiS.**

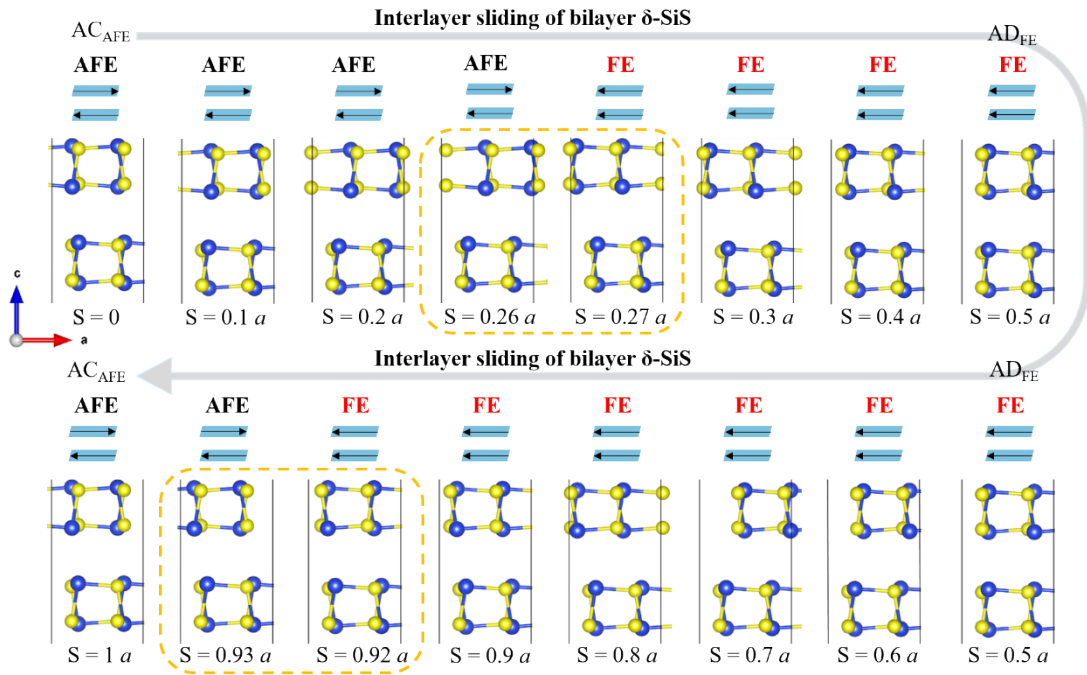

**Fig. S4** Atomic structures of reversible AFE-FE-AFE transition under mechanical interlayer sliding for bilayer  $\delta$ -SiS of AC stacking. Parameter  $a$  is the lattice constant in the  $x$ -direction.

**S6. Atomic structures of reversible AFE-FE-AFE transition through mechanical interlayer sliding along the path  $AC_{AFE}$ - $AD_{FE}$ - $AC_{AFE}$  of bilayer  $\delta$ -SiSe.**

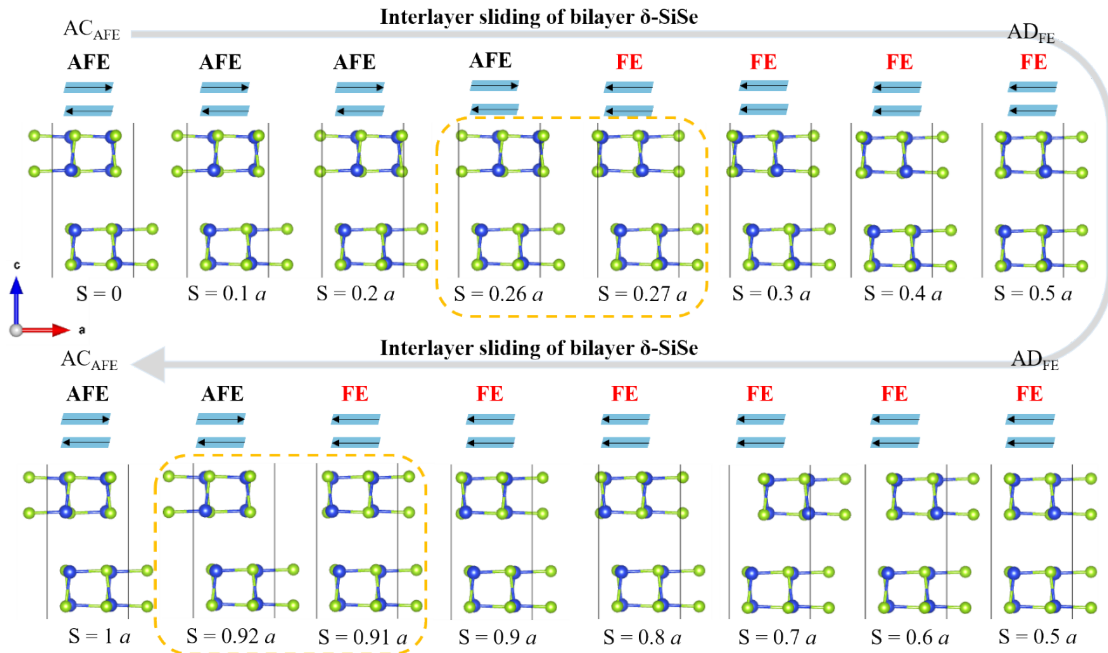

**Fig. S5** Atomic structures of reversible AFE-FE-AFE transition under mechanical interlayer sliding for AC stacking of bilayer  $\delta$ -SiSe. Parameter  $a$  is the lattice constant in the  $x$ -direction.

**S7. Variations in relative energy and polarization under the path  $AC_{AFE}$ - $AD_{FE}$ - $AC_{AFE}$  for bilayer  $\delta$ -SiSe.**

As shown in **Fig. S6(a)**, for  $AC_{AFE}$ - $AD_{FE}$ - $AC_{AFE}$  transition, total energy of bilayer SiSe in the  $AC_{AFE}$  stacking initially decreases to 0 at a sliding distance of  $0.2 a$ , gradually rises to realize the AFE-FE transition between  $0.26 a$  and  $0.27 a$ , steadily increases up to  $5.88 \text{ meV/atom}$  at the  $AD_{FE}$  stacking, and finally exhibits a large increasement of  $10.06 \text{ meV/atoms}$  to its utmost until it reaches original position. Also, the polarization magnitude reaches up to  $\sim 70 \mu\text{C}/\text{cm}^2$  with the sliding distance increasing, also indicates a reversible AFE-FE-AFE transition during the  $AC_{AFE}$ - $AD_{FE}$ - $AC_{AFE}$  sliding process, shown in **Fig. S6(b)**.

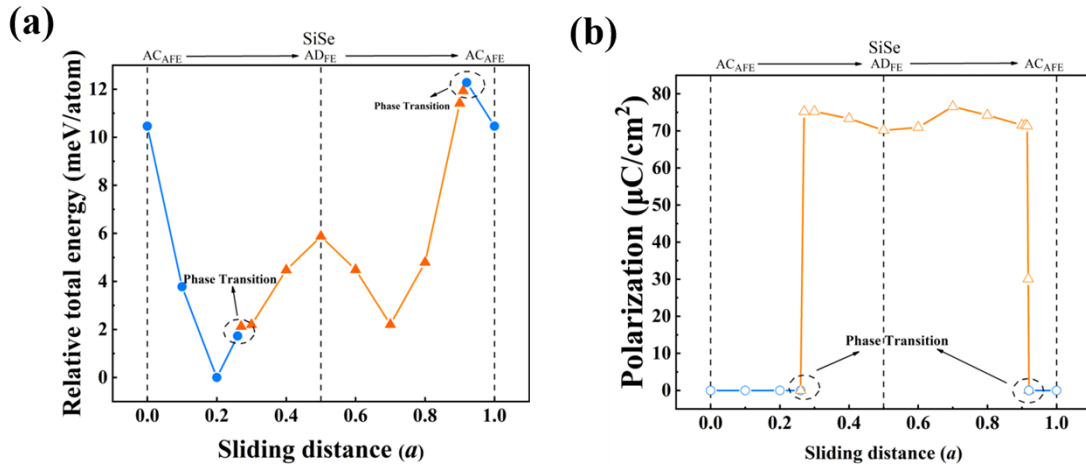

**Fig. S6** Variations in relative energy and polarization under the path  $AC_{AFE}$ - $AD_{FE}$ - $AC_{AFE}$ . (a) The relative total energy and (b) polarization curve of bilayer  $\delta$ -SiSe.



**S8. Phonon spectrum of bilayer  $\delta$ -SiS in  $AA_{FE}$  stacking.**

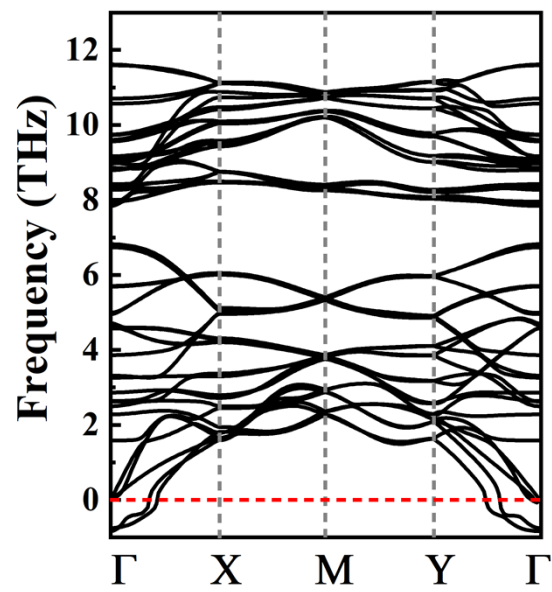

**Fig. S7** Phonon spectrum of bilayer  $\delta$ -SiS in  $AA_{FE}$  stacking.

**S9. Planar average charge density of path  $AB_{AFE}-AA_{FE}-AB_{AFE}$  and path  $AC_{AFE}-AD_{FE}-AC_{AFE}$  with sliding distance between  $0.2 a$  and  $0.3 a$ .**

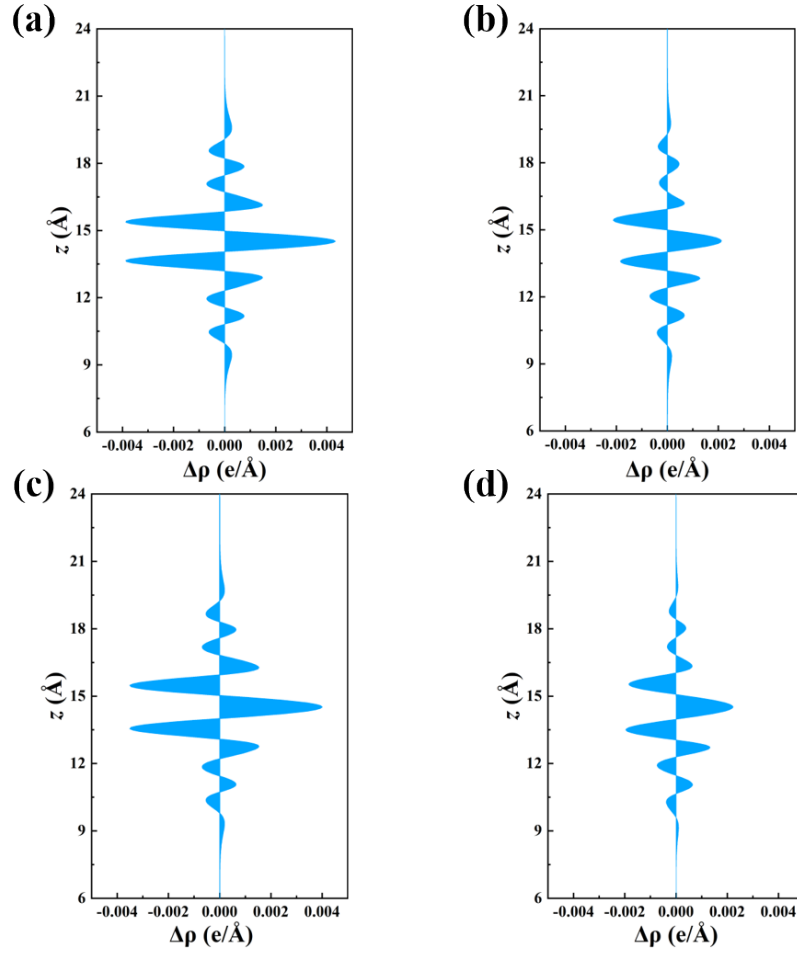

**Fig. S8** The planar average charge density of path  $AB_{AFE}-AA_{FE}-AB_{AFE}$  with sliding distance between (a)  $0.2 a$  and (b)  $0.3 a$  and path  $AC_{AFE}-AD_{FE}-AC_{AFE}$  with sliding distance between (c)  $0.2 a$  and (d)  $0.3 a$  for bilayer  $\delta$ -SiS.

## S10. Interlayer sliding effect on related lattice parameters and energy for path

$AC_{AFE}-AD_{FE}-AC_{AFE}$ .

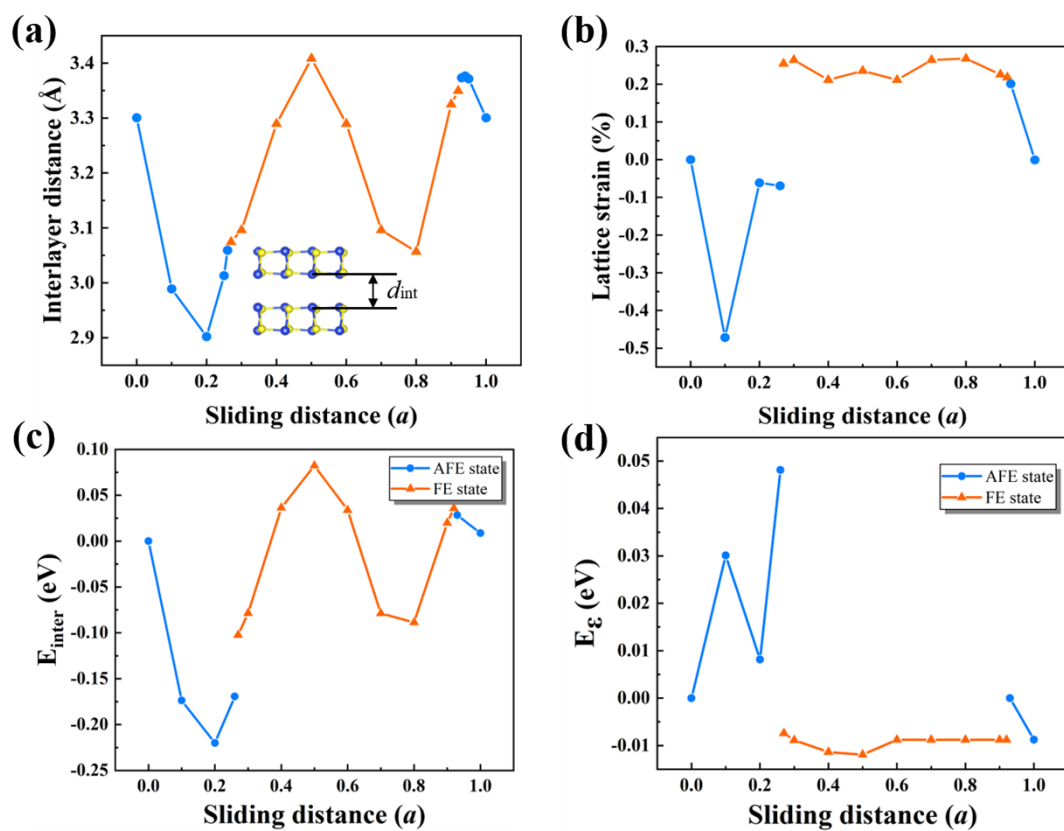

**Fig. S9** (a) Interlayer distance change with respect to sliding distance. (b) Lattice strain variation under interlayer sliding moving from 0  $a$  to 1  $a$ . (c)  $E_{inter}$  and (d)  $E_c$  of the relaxed bilayer  $\delta$ -SiS through mechanical sliding.

## S11. Interlayer sliding effect on related lattice parameters and energy for path

$AC_{AFE}-AD_{FE}-AC_{AFE}$ .

**Table S2.** Total energies (eV) variations in the sliding process with interlayer distance constrained under AFE and FE state for  $\delta$ -SiS bilayer.

| State   | 0       | 0.1     | 0.2     | 0.3     | 0.4     | 0.5     | 0.6     | 0.7     | 0.8     | 0.9     | 1       |
|---------|---------|---------|---------|---------|---------|---------|---------|---------|---------|---------|---------|
| AB      | -78.662 | -78.662 | -78.661 | -78.656 | -78.649 | -78.645 | -78.649 | -78.656 | -48.661 | -78.662 | -78.662 |
| anti-AB | -78.667 | -78.673 | -78.671 | -78.659 | -78.645 | -78.64  | -78.644 | -78.65  | -78.654 | -78.659 | -78.667 |

## REFERENCES

<sup>1</sup> Bo Xu, Junkai Deng, Xiangdong Ding, Jun Sun, and Jefferson Zhe Liu, npj Computational Materials **8**, 47 (2022).
